# Supplementary material for: Genome-wide identification and expression analysis of C2H2 zinc finger proteins in Chinese jujube (Ziziphus jujuba Mill.) in different fruit development stages and under different levels of water stress
Source: PeerJ. 2024 Nov 29;12:e18455. doi: 10.7717/peerj.18455 (PMC11610476; doi:10.7717/peerj.18455)
Supplement: Data S1 [file peerj-12-18455-s005.xlsx]

## Sheet: Sheet1
	Fruit development	CK-1	CK-2	CK-3	LS-1	LS-2	LS-3	MS-1	MS-2	MS-3	SS-1	SS-2	SS-3
Protective enzyme activities	SOD	636.959	609.532	646.07	725.71	863.478	794.634	888.915	963.812	890.849	1058.34	999.163	1007.27
	POD	86851.4	87653.9	86290.7	56693	55534.4	55500.9	75718.9	76813.7	75245.8	68744.9	68192.8	67750.7
	CAT	1384.56	1397.45	1375.73	1223.24	1268.66	1273.34	1365.07	1436.4	1468.52	953.331	1083.69	954.474
	MDA	61.1253	59.5936	59.0889	71.715	70.901	72.9923	68.0561	70.8998	71.2013	69.4081	68.6556	68.6617
	H2O2	5.46757	5.79249	5.94133	7.23148	7.86053	7.58578	8.65477	8.2174	8.37678	10.1926	9.20547	9.46382
	Proline	0.17795	0.172744	0.173041	0.043558	0.0439351	0.0468347	0.0344564	0.0352955	0.0356006	0.0446834	0.0428683	0.0451608
ZjC2H2-ZFPs	ZjC2H2-48	4.4119	3.22408	1.72579	4.07199	3.72237	3.51763	2.34441	1.48245	1.08828	1.46155	0.995387	1.3835
	ZjC2H2-2	1.83418	1.86391	1.98139	1.03468	1.37692	1.29096	1.26487	1.62328	1.59991	1.95078	2.12422	1.86643
	ZjC2H2-7	169.298	193.686	234.593	171.93	183.57	206.397	120.085	129.614	121.686	143.628	126.803	126.363
	ZjC2H2-20	1.19981	1.58723	2.0672	0.610471	0.31246	0.668139	0.710746	0.399063	0.943963	0.975828	0.98176	1.16474
	ZjC2H2-19	0.957158	1.01196	1.06537	0.832739	0.875614	0.887627	0.172125	0.524635	0.514361	1.1011	0.780484	0.813246
	ZjC2H2-63	10.0989	11.1531	12.1832	11.2657	12.8852	11.4858	12.6537	14.7381	13.3665	16.5589	11.9973	13.2573
	ZjC2H2-26	21.6671	20.2096	21.24	45.0372	46.0057	44.3708	27.0677	28.4776	30.0553	24.6186	23.0713	23.3622
	ZjC2H2-12	29.3094	26.6701	22.671	59.1834	60.6068	56.339	33.9853	35.8393	35.8545	26.9148	26.1084	25.0159
	ZjC2H2-34	40.3178	46.3149	56.0587	0.062068	0.277973	0	4.55254	5.49092	5.03864	38.6781	35.5306	33.2332
	ZjC2H2-9	6.10426	7.35429	7.59828	1.55953	1.25994	2.34274	0.747641	0.559705	0.620603	2.07051	3.19339	2.33902
	ZjC2H2-30	49.9743	48.1735	43.2884	23.7086	24.924	24.3283	34.5428	31.6063	30.6213	49.3523	48.3685	46.168
	ZjC2H2-10	1.80053	1.36352	1.87048	3.24193	3.16005	2.33762	1.6837	2.83604	1.67713	1.14899	1.7814	3.18366
	ZjC2H2-32	14.4357	16.06	18.8817	24.9688	23.4264	25.1465	10.2045	11.1527	10.7627	16.8287	17.4941	18.0236
	ZjC2H2-73	1.48133	1.93987	1.88644	2.50691	1.96032	2.04255	0.864795	0.971114	0.592227	0.456666	0.400301	0.265723
	ZjC2H2-43	9.73348	9.40307	8.43807	17.8573	16.8179	19.248	16.4956	15.0074	16.0018	7.03566	7.45803	7.8085
	ZjC2H2-74	55.1117	53.9383	49.2399	78.3684	80.0862	72.3764	76.3692	65.7373	69.8292	59.5031	55.0076	51.2793
	ZjC2H2-3	11.2419	11.9196	11.6803	20.7841	17.8756	17.3928	10.5418	9.583	10.0482	11.1082	11.4991	11.2178
	ZjC2H2-69	2.68846	2.34079	1.98516	3.85246	2.96309	4.01014	1.90542	2.87419	2.29458	1.94629	1.62482	1.60151
	ZjC2H2-18	21.385	22.1524	23.4962	11.3355	11.746	11.4089	16.4034	16.4424	18.5948	23.3821	17.7456	19.475
	ZjC2H2-53	82.2904	73.924	62.221	46.3414	46.2035	44.0825	84.5746	67.9888	79.5435	69.3608	61.4048	66.5103
	ZjC2H2-36	34.0611	33.9398	34.5234	44.6311	44.2848	46.1049	46.9786	47.6016	50.367	44.442	43.0816	44.8175
	ZjC2H2-49	0.801218	1.08595	1.25177	2.97012	3.61644	3.05768	1.63894	1.84043	2.63719	0.719	0.489088	0.788844
	ZjC2H2-54	17.7564	16.3941	13.6378	21.7999	22.2753	21.8632	14.8773	13.7202	15.1295	12.671	12.927	13.4054
	ZjC2H2-31	49.2385	44.7715	35.7332	64.6715	65.0877	61.4414	59.2385	50.3804	59.8328	52.3926	46.4601	48.5835
	ZjC2H2-57	19.5317	19.6623	19.8997	24.029	23.9922	23.5862	19.9808	21.4326	20.761	22.0331	24.4473	20.3778
	ZjC2H2-55	25.4861	24.9295	22.0106	19.7658	23.7954	21.1864	29.1879	26.6221	23.4309	22.6838	19.2847	22.6225
	ZjC2H2-27	19.1311	19.1226	17.5914	5.98161	5.55039	5.45126	9.71791	9.67529	10.8966	13.6732	14.9545	13.6469
	ZjC2H2-65	9.6658	9.15333	7.47848	43.6773	39.0764	40.9222	9.98038	7.4456	8.93865	10.0162	9.48824	10.1779
	ZjC2H2-11	12.9509	13.9963	13.0205	30.7885	35.1301	34.3823	15.2582	14.3691	15.4216	15.3187	16.6303	17.7404
	ZjC2H2-51	9.86943	11.1636	12.471	11.3832	12.8077	14.7491	6.40174	9.13828	7.88989	6.50893	8.036	7.80756
	ZjC2H2-13	2.01964	2.31156	2.24381	2.43322	2.06769	2.24654	1.69489	1.8081	1.73049	1.71842	2.27143	2.72702
	ZjC2H2-21	2.67666	2.82789	2.99455	3.77815	2.52955	3.68395	2.17715	2.79407	2.58174	2.58403	2.96162	2.8728
	ZjC2H2-35	4.55815	3.70463	4.02824	3.21849	2.9429	2.97947	4.07568	3.37504	3.90102	4.55933	3.87052	3.74489
	ZjC2H2-72	1.72444	1.35678	1.22629	0.717529	0.292136	0.749614	1.46193	0.994946	0.529537	0.411728	0.218733	0.593987
	ZjC2H2-33	0.679075	1.16877	1.17576	0.674287	1.61058	0.137757	0.671648	4.31963	2.0679	0.670653	0.516815	1.58278
	ZjC2H2-67	0.514436	0.619782	0.974209	0.929672	1.11029	1.86279	1.61894	3.81775	1.64488	0.711279	1.21043	0.955099
	ZjC2H2-41	23.15	23.6335	25.3713	29.8495	29.5452	37.374	23.5072	26.1248	20.8108	29.1086	29.777	30.5065
	ZjC2H2-50	8.11114	8.26042	7.40014	39.8277	40.9192	44.6718	11.7334	12.6692	13.4858	10.9145	10.4646	11.2949
	ZjC2H2-56	14.3376	13.7748	12.684	2.30347	2.51933	3.15797	13.9644	12.2047	9.61225	10.602	13.0323	12.8945
	ZjC2H2-75	0.523711	0.578377	0.661181	0.040446	0.072456	0	2.52713	4.25673	3.0645	2.97067	2.48001	2.40624
	ZjC2H2-8	9.75418	7.4065	4.59469	13.3697	12.5197	13.5019	12.6914	9.67491	15.4683	12.946	15.6476	16.2326
	ZjC2H2-16	1.27448	1.23439	1.74153	0	0.041488	0	0	0.105974	0	2.25915	3.21732	1.79959
	ZjC2H2-39	5.87844	6.0494	6.77211	0.794479	0.965774	0.999958	3.23742	3.5056	2.53376	6.67543	7.01365	6.20106
