# Supplementary material for: Genome-wide identification and expression analysis of C2H2 zinc finger proteins in Chinese jujube (Ziziphus jujuba Mill.) in different fruit development stages and under different levels of water stress
Source: PeerJ. 2024 Nov 29;12:e18455. doi: 10.7717/peerj.18455 (PMC11610476; doi:10.7717/peerj.18455)
Supplement: Data S2 [file peerj-12-18455-s006.xlsx]

## Sheet: data
GeneID	Y-1	Y-2	Y-3	EN-1	EN-2	EN-3	WM-1	WM-2	WM-3	HR-1	HR-2	HR-3	FR-1	FR-2	FR-3
ZjC2H2-1	0.868795	1.44961	1.32891	2.51199	1.69776	2.80248	4.35825	4.5827	3.66395	4.25258	6.13505	5.42285	4.86362	5.45644	3.7882
ZjC2H2-2	7.16073	7.69841	9.0074	5.91142	5.77477	6.88085	4.25032	5.0731	4.01097	6.20222	5.20527	6.30345	4.07249	3.7849	3.69944
ZjC2H2-3	12.2467	13.2225	14.1303	13.4436	12.147	13.2655	28.8645	22.3823	23.2695	19.3848	19.5747	23.6797	32.3278	34.6872	34.8638
ZjC2H2-7	836.288	829.795	795.217	933.358	933.049	921.198	213.971	356.077	228.886	261.658	248.444	186.664	176.031	175.293	161.658
ZjC2H2-8	0.885112	1.64286	2.41172	0.498595	1.18329	0.860766	26.8085	16.9322	21.5205	23.5097	19.9288	16.1564	9.56579	13.4715	14.5838
ZjC2H2-9	8.53392	11.3981	11.3166	4.87749	6.35802	5.4925	1.78757	1.16478	2.44458	1.176	2.47286	1.40776	1.43479	1.66302	1.78581
ZjC2H2-10	1.4737	2.44136	6.10631	3.44956	2.34463	4.03667	1.73117	1.06718	4.73869	9.92795	28.3171	4.90768	2.11697	2.25086	8.47994
ZjC2H2-11	10.1259	8.65127	8.24939	9.3714	8.89194	9.68839	7.88641	7.47288	6.72993	9.26059	9.21218	11.0576	10.1557	12.2871	13.4474
ZjC2H2-12	74.9623	73.8248	58.8406	79.0014	76.7644	76.5101	92.9637	89.9822	85.8738	45.2869	44.6528	50.2202	89.5931	90.0182	84.7671
ZjC2H2-13	66.7331	58.0696	55.1754	50.6192	48.9969	52.7499	52.6082	50.7508	54.0511	28.06	48.9927	50.5334	49.0113	56.3379	49.4707
ZjC2H2-14	1.39805	1.45419	1.28229	1.19248	1.29192	1.37935	0.400702	0.414266	0.367117	0.462247	0.958657	0.20755	0.494854	0.382718	0.288847
ZjC2H2-17	0	0	0	0	0	0	0.390733	0.182435	0.824468	1.79829	1.41202	1.57029	1.52141	0.647083	3.18645
ZjC2H2-18	13.1528	13.114	12.5383	12.4151	13.9563	14.1528	20.3122	17.7018	21.9824	16.9055	17.78	17.5774	24.1836	22.7472	24.9901
ZjC2H2-20	15.7015	16.7805	15.297	32.5689	32.9087	29.5625	12.9183	15.3144	13.0344	7.05898	7.10703	4.87908	5.82532	7.21773	5.47935
ZjC2H2-22	2.45961	2.32426	3.02297	1.32225	1.84487	1.63805	1.09917	1.24657	0.75811	0.99815	1.24014	0.709342	0.85107	1.15243	1.19797
ZjC2H2-26	9.51846	12.6805	13.1105	10.7133	12.7487	11.4262	13.5246	13.1544	11.6051	13.6828	13.752	14.7784	24.677	22.0585	24.2637
ZjC2H2-27	14.9951	14.5956	16.5449	8.39723	8.51313	7.88868	4.32214	6.10208	4.94357	4.95171	4.37507	4.76057	2.23168	2.23217	2.26437
ZjC2H2-28	1.36821	0.927129	1.55963	1.09927	1.13311	1.61581	1.18663	1.15359	1.56589	0.525691	0.797706	1.56706	0.687027	0.537368	0.336215
ZjC2H2-30	13.9376	16.6465	15.4618	12.3328	13.2825	11.9385	13.6426	16.0012	18.0272	15.8886	15.1848	15.8321	14.6092	11.7716	12.6346
ZjC2H2-31	28.7349	24.5987	27.6006	31.9179	32.4045	31.3986	27.1128	24.6039	25.8358	20.8239	18.9288	22.586	19.3435	18.3674	16.6308
ZjC2H2-32	20.732	20.3543	19.8863	22.4677	20.0086	22.5936	7.96778	8.89042	7.94026	9.8876	12.7594	10.19	10.8011	11.1259	14.6272
ZjC2H2-33	79.4684	202.128	295.616	183.935	162.586	219.672	34.7779	42.0053	67.2525	91.4623	231.37	46.1533	12.5408	14.1623	22.7438
ZjC2H2-34	3.31043	4.40614	4.58907	0.679708	1.23733	0.82458	0	0	0	0	0	0	0	0	0
ZjC2H2-35	4.23891	4.92343	4.87021	4.35112	4.17373	4.90964	3.77085	3.61419	3.58189	3.21254	3.97683	3.51816	3.59362	3.68035	3.8262
ZjC2H2-36	22.0358	27.9716	28.4709	31.5539	30.4272	33.5815	33.7934	26.0219	32.0891	37.9157	39.013	36.9902	32.2308	38.4642	49.9537
ZjC2H2-39	4.40913	4.60135	4.64835	6.24036	5.49273	5.23064	1.1686	1.79058	1.24234	2.86862	2.39071	1.74983	3.08136	3.30918	3.18167
ZjC2H2-41	15.9193	15.7383	17.914	18.1629	22.4705	19.3103	47.8403	39.622	34.7805	63.7567	59.343	55.193	70.4969	78.9007	90.6544
ZjC2H2-43	15.9922	16.5865	18.0196	13.8186	16.7786	13.3279	3.52852	3.70274	3.46767	3.49906	2.68701	2.31723	1.99415	1.68343	1.97458
ZjC2H2-48	20.7212	23.5059	25.7914	8.9072	10.726	8.65616	1.30809	1.14175	1.38026	1.0464	1.36464	0.699223	0.713026	1.07899	1.00905
ZjC2H2-50	0.923605	3.84365	9.73828	0.666586	1.08834	0.868143	49.9062	17.9224	48.6626	52.589	98.9979	37.28	112.96	147.491	186.37
ZjC2H2-51	8.71165	10.5312	10.4653	8.71447	10.1279	9.20196	14.8224	13.6291	13.8274	12.8687	13.7216	14.498	20.6789	19.4531	18.103
ZjC2H2-53	23.5215	20.1714	20.0194	18.6617	19.5138	18.7302	15.2764	10.5455	12.1521	11.0162	9.64574	11.4204	19.5695	22.7648	23.8451
ZjC2H2-54	32.8096	30.3739	30.642	28.93	29.0526	30.3097	31.3222	31.4389	28.1081	20.9755	22.0636	19.6698	28.7512	28.54	27.1232
ZjC2H2-55	7.13858	9.45599	8.85696	6.63607	6.41561	8.03011	2.78704	3.47011	2.27462	2.75699	4.54087	3.8681	2.12061	3.07629	2.38752
ZjC2H2-56	0.989472	1.53263	1.55302	0.203177	0.101471	0.241922	0	0	0.0334331	0.321975	0.351993	0.0653617	0.0949031	0.253178	0.0312764
ZjC2H2-57	16.0386	16.6974	15.2704	16.2941	15.2068	17.5877	22.1469	20.9646	21.4498	24.3044	27.4028	28.2744	33.0397	35.3135	30.799
ZjC2H2-63	8.38149	9.26775	11.5977	9.18665	8.74627	7.26685	7.88263	7.74249	7.30735	8.81494	10.2678	8.92041	9.19227	8.00348	7.02533
ZjC2H2-65	8.49707	8.99968	7.20446	8.96596	9.72277	8.36969	7.71436	6.21677	6.79488	7.335	7.388	8.66567	7.85342	9.00994	8.42264
