# Supplementary material for: Genome-wide identification and expression analysis of C2H2 zinc finger proteins in Chinese jujube (Ziziphus jujuba Mill.) in different fruit development stages and under different levels of water stress
Source: PeerJ. 2024 Nov 29;12:e18455. doi: 10.7717/peerj.18455 (PMC11610476; doi:10.7717/peerj.18455)
Supplement: Table S1 [file peerj-12-18455-s001.xlsx]

## Sheet: Sheet1
Table S1. Specific primer pairs
Genes of jujube	Primer sequences (5'-3')
ZjC2H2-12-F	CCATGGAAGCTCCGGCAA
ZjC2H2-12-R	ATCACCCAATGCCCGAGC
ZjC2H2-34-F	CAAAGCAGCCACCGGAGA
ZjC2H2-34-R	CCCTGCAATCACTCGGCA
ZjC2H2-30-F	GCACTTCAGGCAGCTCCA
ZjC2H2-30-R	GACTATGGACCTCGCCGC
ZjC2H2-53-F	ACTAACACCGGCCAAGGC
ZjC2H2-53-R	GAAGCAATGCGGTGGCTG
ZjC2H2-31-F	ATCCGCCACTGCATTGCT
ZjC2H2-31-R	GCAGCAGGTTGATGGGGT
ZjC2H2-50-F	GAGCCACCGTGGTTTCGA
ZjC2H2-50-R	AACGGCAAAGGGCTCTCC
ZjC2H2-7-F	CTGCAGTCAAAACGCCCG
ZjC2H2-7-R	CAGGGTGGGGAGTTGCAG
ZjC2H2-74-F	TGGCTTCTCGGGTTGCAG
ZjC2H2-74-R	TCCACCTCTCGGCCTTGA
ZjActin-F	GCCATCCAGGCAGTTCTC
ZjActin-R	CAGCAAGGTCCAAACGAA
