# Supplementary material for: Genome-wide identification and expression analysis of C2H2 zinc finger proteins in Chinese jujube (Ziziphus jujuba Mill.) in different fruit development stages and under different levels of water stress
Source: PeerJ. 2024 Nov 29;12:e18455. doi: 10.7717/peerj.18455 (PMC11610476; doi:10.7717/peerj.18455)
Supplement: Table S2 [file peerj-12-18455-s002.xls]

## Sheet: Sheet1
Gene	GeneID	Number of amino acid	Molecular weight	Theoretical pI	Total number of atoms	Instability index	Aliphatic index	Grand average of hydropathicity (GRAVY)
ZjC2H2-1	LOC107417299	501	55487	5.93	7579	50.72	53.01	-0.933
ZjC2H2-2	LOC107421439	364	42066.4	9.16	5911	36.79	77.06	-0.53
ZjC2H2-3	LOC107423753	695	77217.5	7.57	10845	50.59	77.78	-0.633
ZjC2H2-4	LOC107408857	310	34273.6	5.88	4720	58.48	62	-0.877
ZjC2H2-5	LOC107409426	336	38054.9	8.3	5235	49.43	51.4	-0.807
ZjC2H2-6	LOC107410437	537	60618.9	6.35	8328	52.18	52.81	-1.153
ZjC2H2-7	LOC107410531	308	33231.9	4.57	4560	38.42	51.62	-1.142
ZjC2H2-8	LOC107410663	340	36377.3	6.31	5013	74.1	61.47	-0.54
ZjC2H2-9	LOC107410860	382	42540.4	8.86	5956	48.14	77.54	-0.316
ZjC2H2-10	LOC107411056	195	21521.6	9.3	3011	48.49	75.38	-0.605
ZjC2H2-11	LOC107411674	303	35230	6	4877	56.42	55.71	-1.273
ZjC2H2-12	LOC107411927	536	58851.1	9.1	8110	46.84	59.72	-0.652
ZjC2H2-13	LOC107412546	372	42730.6	6.08	5875	57.92	50.11	-1.112
ZjC2H2-14	LOC107412682	357	40315.9	8.13	5501	50.26	52.21	-0.793
ZjC2H2-15	LOC107412789	343	37261.2	8.78	5122	44.43	62.27	-0.7
ZjC2H2-16	LOC107413275	395	44137.3	6.8	6015	74.16	50.94	-1.077
ZjC2H2-17	LOC107413509	189	20635.3	9.47	2867	72.52	66.51	-0.547
ZjC2H2-18	LOC107415251	267	31363.3	9.35	4391	51.4	79.63	-0.531
ZjC2H2-19	LOC107415907	581	64820.2	8.14	8977	41.06	63.94	-0.688
ZjC2H2-20	LOC107416167	260	27947.9	5.03	3872	40.62	78.46	-0.298
ZjC2H2-21	LOC107417193	246	27645.5	9.32	3826	58.15	55.2	-0.773
ZjC2H2-22	LOC107417196	472	51190.5	9.16	7073	48.33	61.84	-0.564
ZjC2H2-23	LOC107417345	222	24139.8	7.34	3298	61.36	61.62	-0.627
ZjC2H2-24	LOC107417648	360	40527.2	7.25	5545	54.26	56.33	-0.811
ZjC2H2-25	LOC107418045	260	29316.5	9	4055	58.85	62.65	-0.65
ZjC2H2-26	LOC107418119	264	30714.2	9.13	4258	46.67	70.98	-0.563
ZjC2H2-27	LOC107418186	1454	162472	8.93	22621	54.45	66.92	-0.652
ZjC2H2-28	LOC107419157	609	66414.2	8.79	9212	53.25	63.3	-0.766
ZjC2H2-29	LOC107419920	303	34277.1	8.46	4717	58.03	56.04	-0.863
ZjC2H2-30	LOC107419957	429	49221.6	6.19	6847	48.27	76.32	-0.662
ZjC2H2-31	LOC107420040	497	54384.2	9.05	7531	53.44	65.65	-0.574
ZjC2H2-32	LOC107420256	539	56848.6	8.86	7867	48.53	64.38	-0.377
ZjC2H2-33	LOC107420575	255	26899.5	8.22	3684	65.29	48.75	-0.729
ZjC2H2-34	LOC107421015	420	45874.7	9.44	6440	47.07	70.79	-0.474
ZjC2H2-35	LOC107421452	639	72711.6	9.43	10120	58.48	61.8	-0.753
ZjC2H2-36	LOC107421607	527	58534.2	5.91	8050	52.63	62.41	-0.706
ZjC2H2-37	LOC107422968	200	22020.8	5.79	2969	61.68	46.5	-0.946
ZjC2H2-38	LOC107422969	267	29696.1	9.41	4103	47.44	60.3	-0.801
ZjC2H2-39	LOC107424180	394	44349.9	5.44	6103	77.83	51.73	-1.135
ZjC2H2-40	LOC107424295	267	26416.6	5.01	3610	69.13	39.21	-0.876
ZjC2H2-41	LOC107424844	536	55987.7	8.95	7770	66.04	60	-0.536
ZjC2H2-42	LOC107425187	350	39152.2	5.28	5409	48.26	67.69	-0.561
ZjC2H2-43	LOC107425259	573	62231.4	8.83	8564	49.14	57.16	-0.712
ZjC2H2-44	LOC107425377	350	39152.2	5.28	5409	48.26	67.69	-0.561
ZjC2H2-45	LOC107425713	341	37513.3	6.32	5138	46.25	61.5	-0.725
ZjC2H2-46	LOC107425717	341	36966.6	6.41	5052	49.04	49.04	-0.71
ZjC2H2-47	LOC107425719	341	36962.7	6.35	5055	45.96	60.35	-0.677
ZjC2H2-48	LOC107425870	481	52628.8	9.05	7269	31.86	62.77	-0.645
ZjC2H2-49	LOC107426293	591	65037.2	8.72	8897	52.68	52.84	-0.832
ZjC2H2-50	LOC107426833	261	27509.3	7.17	3768	72.1	51.84	-0.7
ZjC2H2-51	LOC107427936	251	28483.2	9.19	3960	56.69	62.95	-0.68
ZjC2H2-52	LOC107428014	173	19064.1	8.49	2612	57.74	54.74	-0.777
ZjC2H2-53	LOC107428314	581	62212.2	9.44	8548	51.9	55.7	-0.704
ZjC2H2-54	LOC107428319	604	65580.2	9.12	8980	53.06	55.26	-0.793
ZjC2H2-55	LOC107429212	253	27612.6	5.68	3791	53.77	62.13	-0.532
ZjC2H2-56	LOC107429215	454	50452.6	8.48	6990	72.51	64.1	-0.77
ZjC2H2-57	LOC107429276	482	53317.2	7	7509	53.54	77.01	-0.572
ZjC2H2-58	LOC107429479	307	34849.5	6.57	4721	64.36	49.25	-0.975
ZjC2H2-59	LOC107430492	272	28978.8	6.02	3951	70.21	60.66	-0.615
ZjC2H2-60	LOC107431516	201	22809.7	9.32	3146	39.39	63.18	-0.794
ZjC2H2-61	LOC107431920	321	34292.1	8.1	4711	54.3	55.95	-0.616
ZjC2H2-62	LOC107432318	207	22602.4	7.67	3144	56.31	73.48	-0.54
ZjC2H2-63	LOC107432358	270	29725	9.04	4141	42.97	61.7	-0.632
ZjC2H2-64	LOC107432814	179	19964.3	9.54	2817	58.28	75.7	-0.348
ZjC2H2-65	LOC107433017	361	41820.7	9.18	5792	55.53	64.52	-0.799
ZjC2H2-66	LOC107433184	213	23744.2	9.63	3240	69.87	50.05	-0.865
ZjC2H2-67	LOC107433725	255	26899.5	8.22	3684	65.29	48.75	-0.729
ZjC2H2-68	LOC107435832	402	43966.8	9.42	6133	55.48	70.85	-0.499
ZjC2H2-69	LOC107403311	522	57434.2	9.26	7934	50.77	59.48	-0.705
ZjC2H2-70	LOC107403391	372	42730.6	6.08	5875	57.92	50.11	-1.112
ZjC2H2-71	LOC107403482	260	29354.5	9.09	4066	56.64	62.65	-0.69
ZjC2H2-72	LOC107403750	352	39520.2	6.33	5406	61.46	49.38	-0.83
ZjC2H2-73	LOC107404161	522	57471.2	9.25	7932	48.85	57.99	-0.723
ZjC2H2-74	LOC107405043	365	42500.3	9.09	5870	50.25	55.01	-0.957
ZjC2H2-75	LOC107405852	343	36810.1	6.86	5089	73.76	66.33	-0.416
ZjC2H2-76	LOC107406603	321	34292.1	8.1	4711	54.3	55.95	-0.616
ZjC2H2-77	LOC107408289	402	43966.8	9.42	6133	55.48	70.85	-0.499
