# Supplementary material for: Genome-wide identification and expression analysis of C2H2 zinc finger proteins in Chinese jujube (Ziziphus jujuba Mill.) in different fruit development stages and under different levels of water stress
Source: PeerJ. 2024 Nov 29;12:e18455. doi: 10.7717/peerj.18455 (PMC11610476; doi:10.7717/peerj.18455)
Supplement: Table S3 [file peerj-12-18455-s003.xlsx]

## Sheet: Sheet1
Table S3 Complete set of classified C2H2 zinc finger proteins in jujube
ZFarrangement: i= isolated/dispersed ZFs, u = ZF with unusual spacing, - = tandem arrangement/short linker (1-10 amino acids), . = dispersed arrangement/long spacer, d = degenerated ZFs, * = linker 0 amino acids
Subset			Gene	ZFarran- gement
A tandem	A1 pl-SF	A1a	ZjC2H2-12	1i.2u-3-4
		A1a	ZjC2H2-21	1i.2u-3
		A1a	ZjC2H2-22	1i.2u-3-4
		A1a	ZjC2H2-31	1i.2u-3-4
		A1a	ZjC2H2-32	1i.2u-3-4
		A1a	ZjC2H2-41	1i.2u-3-4
		A1a	ZjC2H2-43	1i.2u-3-4
		A1a	ZjC2H2-48	1i.2u-3-4
		A1a	ZjC2H2-49	1i.2u-3-4
		A1a	ZjC2H2-53	1i.2u-3-4
		A1a	ZjC2H2-54	1i.2u-3-4
		A1a	ZjC2H2-69	1i.2u-3-4
		A1a	ZjC2H2-73	1i.2u-3-4
		A1b	ZjC2H2-56	1i.2u-3-4
		A1c	ZjC2H2-36	1i.2u-3u-4
		A1c	ZjC2H2-42	1i.2u-3u-4
		A1c	ZjC2H2-44	1i.2u-3u-4
		A1d	ZjC2H2-5	1i.2u-3-4
		A1d	ZjC2H2-14	1i.2u-3-4
		A1d	ZjC2H2-24	1i.2u-3-4
		A1d	ZjC2H2-25	1i.2u-3-4
		A1d	ZjC2H2-58	1i.2u-3-4
		A1d	ZjC2H2-71	1i.2u-3-4
		A1d	ZjC2H2-72	1i.2u-3-4
	A2 pl-SF	A2	ZjC2H2-27	1df*2-3-4
		A2	ZjC2H2-35	1df*2-3-4
	A4 cons. SF	A4	ZjC2H2-13	1-2-3-4.5i
		A4	ZjC2H2-51	1-2.3i
		A4	ZjC2H2-70	1-2-3-4.5i
B cons. SF		B	ZjC2H2-65	1i.2-3-4.5-6-7u-8
		B	ZjC2H2-74	1i.2-3-4.5-6-7u-8-9
C dispersed	C1 C2H3	C1-1i pl-SF
		C1-1i pl-SF	ZjC2H2-3	1i
		C1-1i pl-SF	ZjC2H2-4	1i
		C1-1i pl-SF	ZjC2H2-15	1i
		C1-1i pl-SF	ZjC2H2-20	1i
		C1-1i pl-SF	ZjC2H2-23	1i
		C1-1i pl-SF	ZjC2H2-29	1i
		C1-1i pl-SF	ZjC2H2-37	1i
		C1-1i pl-SF	ZjC2H2-38	1i
		C1-1i pl-SF	ZjC2H2-40	1i
		C1-1i pl-SF	ZjC2H2-45	1i
		C1-1i pl-SF	ZjC2H2-46	1i
		C1-1i pl-SF	ZjC2H2-47	1i
		C1-1i pl-SF	ZjC2H2-52	1i
		C1-1i pl-SF	ZjC2H2-55	1i
		C1-1i pl-SF	ZjC2H2-57	1i
		C1-1i pl-SF	ZjC2H2-59	1i
		C1-1i pl-SF	ZjC2H2-60	1i
		C1-1i pl-SF	ZjC2H2-62	1i
		C1-1i pl-SF	ZjC2H2-66	1i
		C1-2i pl-SF
		C1-2i pl-SF	ZjC2H2-8	1i.2i
		C1-2i pl-SF	ZjC2H2-10	1i.2i
		C1-2i pl-SF	ZjC2H2-16	1i.2i
		C1-2i pl-SF	ZjC2H2-17	1i.2i
		C1-2i pl-SF	ZjC2H2-33	1i.2i
		C1-2i pl-SF	ZjC2H2-50	1i.2i
		C1-2i pl-SF	ZjC2H2-61	1i.2i
		C1-2i pl-SF	ZjC2H2-64	1i.2i
		C1-2i pl-SF	ZjC2H2-67	1i.2i
		C1-2i pl-SF	ZjC2H2-75	1i.2i
		C1-2i pl-SF	ZjC2H2-76	1i.2i
		C1-3i pl-SF
		C1-3i pl-SF	ZjC2H2-39	1i.2i.3i
		C1-4i pl-SF
		C1-4i pl-SF	ZjC2H2-28	1i.2i.3i.4i
		C1-4i pl-SF	ZjC2H2-1	1i.2i.3i.4i
		C1-5i pl-SF
		C1-5i pl-SF	ZjC2H2-19	1i.2i.3i.4i.5i
		C1C2 mixed
		C1C2 mixed	ZjC2H2-6	1i.2i.3i
		C1C2 mixed	ZjC2H2-63	1u.2u.3i.4i
	C2 C2H4	C2-1i pl-SF	ZjC2H2-2	1i
		C2-1i pl-SF	ZjC2H2-7	1i
		C2-1i pl-SF	ZjC2H2-9	1i
		C2-1i pl-SF	ZjC2H2-18	1i
		C2-1i pl-SF	ZjC2H2-26	1i
		C2-1i pl-SF	ZjC2H2-30	1i
		C2-1i pl-SF	ZjC2H2-34	1i
		C2-1i pl-SF	ZjC2H2-68	1i
		C2-1i pl-SF	ZjC2H2-77	1i
	C3 C2H5	C3-1i pl-SF	ZjC2H2-11	1i
