# Supplementary material for: Genome-wide identification and expression analysis of C2H2 zinc finger proteins in Chinese jujube (Ziziphus jujuba Mill.) in different fruit development stages and under different levels of water stress
Source: PeerJ. 2024 Nov 29;12:e18455. doi: 10.7717/peerj.18455 (PMC11610476; doi:10.7717/peerj.18455)
Supplement: Table S4 [file peerj-12-18455-s004.xlsx]

## Sheet: Sheet1
Table S4 ZjC2H2-ZFPs synteny analysis
Blue: orthologous C2H2-ZFPs between jujube and peach. Green: orthologous C2H2-ZFPs between jujube and Arabidopsis.
Chr.	Gene ID in jujube	Start	End	Chr.	Gene ID in peach	Start	End
Zj01	ZjC2H2-3	18665110	18669104	Pp02	Prupe.2G297500.1	28757609	28761431
Zj01	ZjC2H2-4	42044427	42045359	Pp03	Prupe.3G096400.1	7265713	7267365
Zj01	ZjC2H2-1	9485895	9487486	Pp06	Prupe.6G035400.1	2661273	2664038
Zj02	ZjC2H2-13	26396072	26399198	Pp01	Prupe.1G576100.1	46920252	46926322
Zj02	ZjC2H2-12	21439947	21443137	Pp06	Prupe.6G323100.1	28485346	28487933
Zj02	ZjC2H2-11	19131711	19133886	Pp06	Prupe.6G304400.5	27539650	27543941
Zj02	ZjC2H2-10	9124301	9124888	Pp06	Prupe.6G084100.1	5667950	5668753
Zj02	ZjC2H2-14	27593448	27595946	Pp06	Prupe.6G023800.1	1905931	1908706
Zj03	ZjC2H2-17	8807132	8808022	Pp02	Prupe.2G230800.1	25516624	25518105
Zj04	ZjC2H2-19	8176438	8178183	Pp03	Prupe.3G257500.1	24509659	24512060
Zj04	ZjC2H2-18	1582522	1585174	Pp03	Prupe.3G298900.1	26448088	26450572
Zj05	ZjC2H2-26	7685227	7687680	Pp05	Prupe.5G157300.4	13973792	13977207
Zj05	ZjC2H2-27	7975703	7982641	Pp05	Prupe.5G159200.1	14082194	14090842
Zj05	ZjC2H2-24	2633317	2635894	Pp07	Prupe.7G067900.1	10625301	10628049
Zj06	ZjC2H2-31	2800875	2803019	Pp01	Prupe.1G410700.1	35889034	35892412
Zj06	ZjC2H2-32	3765786	3768306	Pp01	Prupe.1G381800.1	34371544	34375526
Zj06	ZjC2H2-30	1695556	1697007	Pp01	Prupe.1G431900.1	36986464	36987747
Zj06	ZjC2H2-34	11066671	11068171	Pp01	Prupe.1G503600.1	41637179	41639575
Zj06	ZjC2H2-33	6239801	6240568	Pp01	Prupe.1G424300.1	36578737	36579899
Zj06	ZjC2H2-29	1189539	1190459	Pp01	Prupe.1G260700.1	26961662	26962928
Zj06	ZjC2H2-31	2800875	2803019	Pp03	Prupe.3G048600.3	3431059	3434661
Zj06	ZjC2H2-33	6239801	6240568	Pp08	Prupe.8G142400.1	15967217	15968121
Zj07	ZjC2H2-37	19714895	19715497	Pp01	Prupe.1G034100.1	2368925	2370453
Zj07	ZjC2H2-37	19714895	19715497	Pp08	Prupe.8G227900.1	20410617	20411264
Zj08	ZjC2H2-41	9201717	9204095	Pp01	Prupe.1G381800.1	34371544	34375526
Zj08	ZjC2H2-39	4726701	4727885	Pp02	Prupe.2G136600.2	19422909	19424561
Zj08	ZjC2H2-43	13125984	13128356	Pp03	Prupe.3G048600.3	3431059	3434661
Zj08	ZjC2H2-42	12835743	12836795	Pp06	Prupe.6G188400.1	19660821	19664595
Zj08	ZjC2H2-40	5567091	5568023	Pp07	Prupe.7G181100.1	17707970	17708900
Zj08	ZjC2H2-41	9201717	9204095	Pp07	Prupe.7G151500.1	16241543	16245456
Zj09	ZjC2H2-51	24604236	24606892	Pp03	Prupe.3G307100.1	26812408	26814702
Zj09	ZjC2H2-52	25079894	25080415	Pp03	Prupe.3G311100.1	26999875	27001422
Zj09	ZjC2H2-48	1474102	1478067	Pp08	Prupe.8G234800.1	20805888	20809375
Zj09	ZjC2H2-49	4760766	4763645	Pp08	Prupe.8G255800.1	21837319	21840354
Zj09	ZjC2H2-50	9269998	9270780	Pp08	Prupe.8G142400.1	15967217	15968121
Zj10	ZjC2H2-58	18822228	18823324	Pp01	Prupe.1G306200.1	29933396	29935032
Zj10	ZjC2H2-57	16647761	16651326	Pp01	Prupe.1G331600.1	31416639	31420005
Zj12	ZjC2H2-64	10851066	10851605	Pp06	Prupe.6G249300.1	24489896	24490735
Zj12	ZjC2H2-61	3289975	3290940	Pp07	Prupe.7G125800.1	14759738	14760721
Chr.	Gene ID in jujube	Start	End	Chr.	Gene ID in Arabidopsis	Start	End
Zj01	ZjC2H2-4	42044427	42045359	Chr1	AT1G80730.1	30339323	30340247
Zj02	ZjC2H2-12	21439947	21443137	Chr1	AT1G55110.1	20560284	20563171
Zj10	ZjC2H2-58	18822228	18823324	Chr1	AT1G13290.1	4550153	4551620
Zj02	ZjC2H2-10	9124301	9124888	Chr2	AT2G28710.1	12322386	12323584
Zj08	ZjC2H2-39	4726701	4727885	Chr2	AT2G45120.1	18603618	18604751
Zj10	ZjC2H2-57	16647761	16651326	Chr2	AT2G01650.1	284672	286493
Zj12	ZjC2H2-64	10851066	10851605	Chr2	AT2G37430.1	15706357	15707224
Zj04	ZjC2H2-19	8176438	8178183	Chr3	AT3G29340.1	11259587	11262440
Zj05	ZjC2H2-27	7975703	7982641	Chr3	AT3G48430.1	17935609	17940746
Zj08	ZjC2H2-39	4726701	4727885	Chr3	AT3G60580.1	22393939	22395044
Zj08	ZjC2H2-41	9201717	9204095	Chr3	AT3G50700.1	18840411	18842950
Zj12	ZjC2H2-64	10851066	10851605	Chr3	AT3G53600.1	19875532	19876059
Zj12	ZjC2H2-63	7171097	7171891	Chr3	AT3G57480.1	21277936	21279354
Zj08	ZjC2H2-40	5567091	5568023	Chr4	AT4G35610.1	16899410	16900225
Zj01	ZjC2H2-1	9485895	9487486	Chr5	AT5G56200.1	22747768	22749249
Zj02	ZjC2H2-11	19131711	19133886	Chr5	AT5G26610.2	9375253	9377125
Zj04	ZjC2H2-19	8176438	8178183	Chr5	AT5G15480.1	5025952	5027160
Zj04	ZjC2H2-18	1582522	1585174	Chr5	AT5G40710.1	16295036	16297004
Zj07	ZjC2H2-37	19714895	19715497	Chr5	AT5G43540.1	17496993	17497406
Zj12	ZjC2H2-61	3289975	3290940	Chr5	AT5G03510.1	880225	881305
